# Supplementary material
Source: MDPI journal article supplement (https://www.mdpi.com/2073-4344/14/4/283)
Supplement: s1 [file s1]

## Platinum-Modified Rod-like Titania Mesocrystals with Enhanced Photocatalytic Activity

Zhishun Wei <sup>1,2</sup>, Yuanyuan Ji <sup>1</sup>, Zuzanna Bielan <sup>3</sup>, Xin Yue <sup>1</sup>, Yuqi Xu <sup>1</sup>, Jiajie Sun <sup>1</sup>, Sha Chen <sup>1,2,\*</sup>, Guoqiang Yi <sup>1,2</sup>, Ying Chang <sup>1,2</sup> and Ewa Kowalska <sup>1,3,\*</sup>

<sup>1</sup> Hubei Provincial Key Laboratory of Green Materials for Light Industry, New Materials and Green Manufacturing Talent Introduction and Innovation Demonstration Base, Hubei University of Technology, Wuhan 430068, China;  
wei.zhishun@hbut.edu.cn (Z.W.); 102100464@hbut.edu.cn (Y.J.);  
yuexin6912@163.com (X.Y.); 102300431@hbut.edu.cn (Y.X.); sjj73727@163.com (J.S.);  
yiguoqiang@hbut.edu.cn (G.Y.); cy0025@hbut.edu.cn (Y.C.)

<sup>2</sup> Hubei Longzhong Laboratory, Xiangyang 441000, China

<sup>3</sup> Faculty of Chemistry, Jagiellonian University, 30-387 Krakow, Poland;  
zuzanna.bielan@uj.edu.pl

\* Correspondence: chensha@hbut.edu.cn (S.C.); ewa.k.kowalska@uj.edu.pl (E.K.)

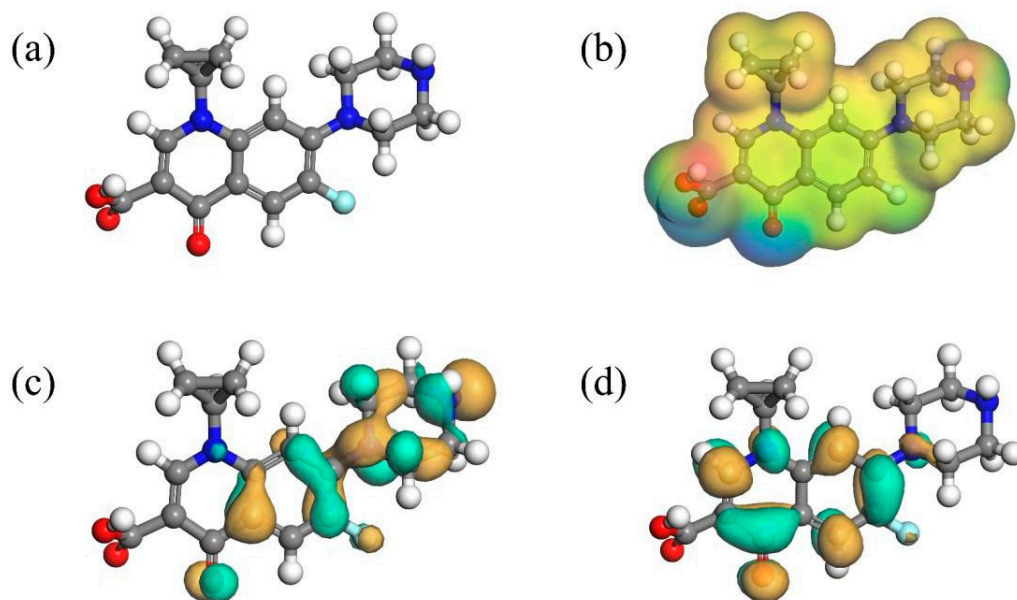

**Figure S1.** DFT calculations of: (a) optimized structure of CIP; (b) ESP mapping of CIP; (c) the HOMO; and (d) the LUMO distributions in CIP; gray – carbon, red – oxygen, blue – nitrogen, white – hydrogen, cyan – fluorine.

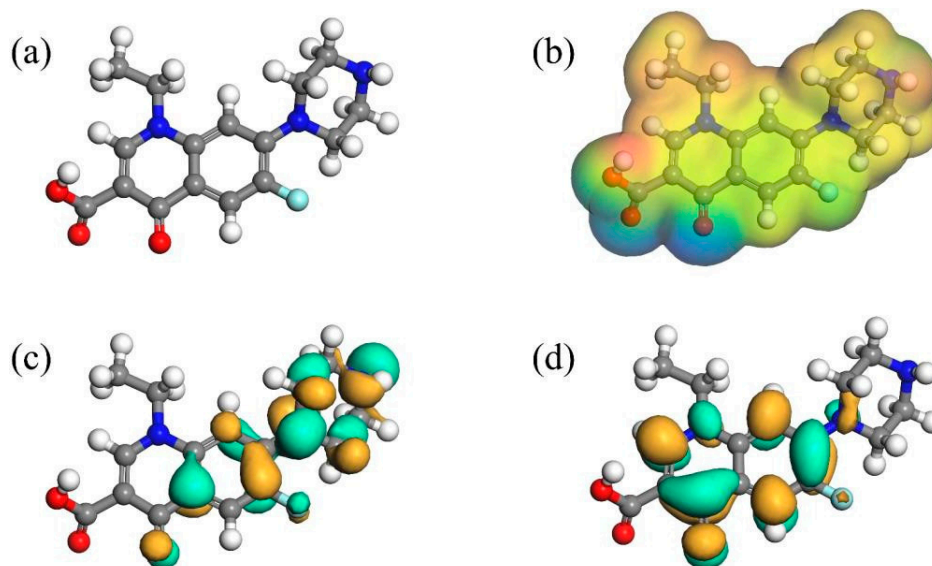

**Figure S2.** DFT calculations of: (a) optimized structure of NOR; (b) ESP mapping of NOR; (c) the HOMO; and (d) the LUMO distributions in NOR; gray – carbon, red – oxygen, blue – nitrogen, white – hydrogen, cyan – fluorine.

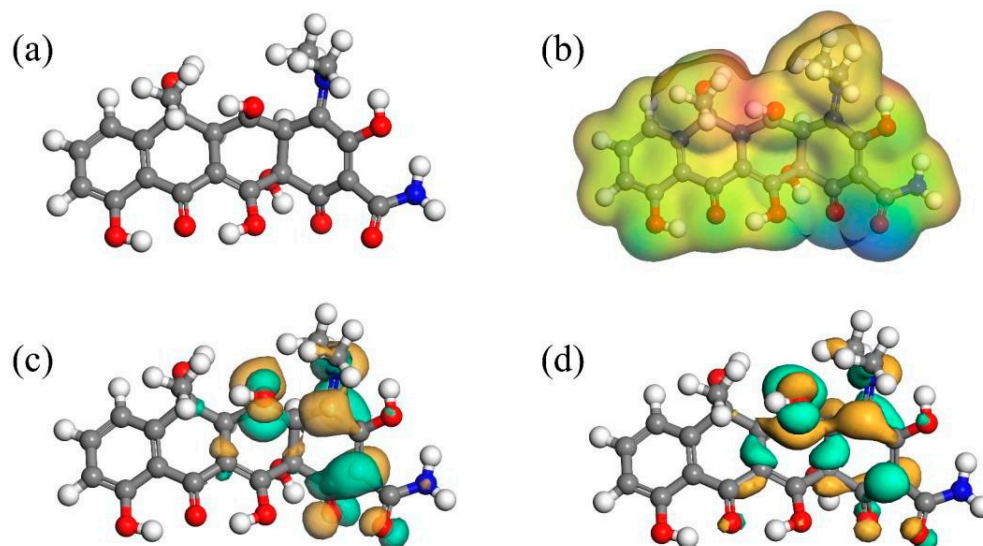

**Figure S3.** DFT calculations of: (a) optimized structure of OTC; (b) ESP mapping of OTC; (c) the HOMO; and (d) the LUMO distributions in OTC; gray – carbon, red – oxygen, blue – nitrogen, white – hydrogen.

**Table S1.** Hirshfeld charge and Fukui index values calculated for TC

| Atom  | q(N)    | q(N+1)  | q(N-1)  | f <sup>-</sup> | f <sup>+</sup> | f <sup>0</sup> |
|-------|---------|---------|---------|----------------|----------------|----------------|
| 1(C)  | 0.0293  | 0.025   | 0.0399  | 0.0106         | 0.0043         | 0.0074         |
| 2(O)  | -0.1598 | -0.192  | -0.1513 | 0.0085         | 0.0321         | 0.0203         |
| 3(C)  | 0.0728  | 0.0639  | 0.0742  | 0.0014         | 0.0089         | 0.0052         |
| 4(O)  | -0.1674 | -0.2141 | -0.14   | 0.0274         | 0.0467         | 0.0371         |
| 5(O)  | -0.1923 | -0.2299 | -0.1319 | 0.0604         | 0.0376         | 0.049          |
| 6(O)  | -0.2232 | -0.295  | -0.2057 | 0.0175         | 0.0717         | 0.0446         |
| 7(O)  | -0.1954 | -0.22   | -0.1922 | 0.0032         | 0.0246         | 0.0139         |
| 8(O)  | -0.2385 | -0.2706 | -0.2101 | 0.0284         | 0.0321         | 0.0302         |
| 9(C)  | 0.1652  | 0.1574  | 0.1737  | 0.0084         | 0.0078         | 0.0081         |
| 10(O) | -0.278  | -0.3009 | -0.2533 | 0.0247         | 0.0229         | 0.0238         |
| 11(N) | -0.1376 | -0.1506 | -0.1206 | 0.0171         | 0.013          | 0.015          |
| 12(N) | -0.088  | -0.0897 | 0.0317  | 0.1197         | 0.0017         | 0.0607         |
| 13(C) | -0.0403 | -0.0456 | -0.0144 | 0.0259         | 0.0053         | 0.0156         |
| 14(C) | -0.0529 | -0.0567 | -0.0277 | 0.0252         | 0.0038         | 0.0145         |
| 15(O) | -0.2181 | -0.2311 | -0.2105 | 0.0076         | 0.013          | 0.0103         |
| 16(C) | 0.1298  | 0.0512  | 0.1366  | 0.0068         | 0.0785         | 0.0427         |
| 17(C) | 0.1065  | 0.0503  | 0.1202  | 0.0136         | 0.0562         | 0.0349         |
| 18(C) | -0.0596 | -0.0766 | -0.0382 | 0.0214         | 0.0171         | 0.0192         |
| 19(C) | 0.1323  | 0.1083  | 0.138   | 0.0057         | 0.024          | 0.0149         |
| 20(C) | -0.0241 | -0.0253 | -0.0185 | 0.0055         | 0.0013         | 0.0034         |
| 21(C) | -0.0187 | -0.0218 | -0.0149 | 0.0039         | 0.0031         | 0.0035         |
| 22(C) | -0.0532 | -0.0583 | -0.0508 | 0.0025         | 0.005          | 0.0037         |
| 23(C) | 0.0871  | 0.0853  | 0.0884  | 0.0013         | 0.0018         | 0.0015         |
| 24(C) | -0.0938 | -0.099  | -0.0901 | 0.0036         | 0.0052         | 0.0044         |
| 25(C) | -0.0587 | -0.0914 | -0.0228 | 0.0359         | 0.0326         | 0.0343         |
| 26(C) | -0.0225 | -0.0796 | 0.0039  | 0.0264         | 0.0571         | 0.0417         |
| 27(C) | -0.0641 | -0.0888 | -0.0172 | 0.0469         | 0.0247         | 0.0358         |
| 28(C) | 0.0046  | -0.0234 | 0.017   | 0.0124         | 0.028          | 0.0202         |
| 29(C) | 0.0998  | 0.0695  | 0.1307  | 0.0309         | 0.0302         | 0.0306         |
| 30(C) | -0.0452 | -0.0546 | -0.0217 | 0.0235         | 0.0094         | 0.0165         |
| 31(C) | 0.1308  | 0.099   | 0.1312  | 0.0004         | 0.0318         | 0.0161         |
| 32(C) | -0.0829 | -0.0933 | -0.0625 | 0.0203         | 0.0104         | 0.0154         |
| 33(H) | 0.0445  | 0.0334  | 0.0569  | 0.0125         | 0.0111         | 0.0118         |
| 34(H) | 0.1332  | 0.1242  | 0.1407  | 0.0075         | 0.009          | 0.0083         |
| 35(H) | 0.1401  | 0.1258  | 0.1492  | 0.0091         | 0.0142         | 0.0117         |
| 36(H) | 0.1359  | 0.1241  | 0.1496  | 0.0136         | 0.0118         | 0.0127         |
| 37(H) | 0.1688  | 0.1581  | 0.1785  | 0.0096         | 0.0107         | 0.0102         |
| 38(H) | 0.14    | 0.1256  | 0.1544  | 0.0144         | 0.0144         | 0.0144         |
| 39(H) | 0.1112  | 0.106   | 0.1178  | 0.0067         | 0.0051         | 0.0059         |
| 40(H) | 0.0344  | 0.0241  | 0.059   | 0.0245         | 0.0103         | 0.0174         |
| 41(H) | 0.032   | 0.0279  | 0.0533  | 0.0213         | 0.0041         | 0.0127         |
| 42(H) | 0.0207  | 0.0125  | 0.0609  | 0.0402         | 0.0082         | 0.0242         |
| 43(H) | 0.0317  | 0.0207  | 0.0569  | 0.0253         | 0.011          | 0.0181         |

|       |        |        |        |        |         |        |
|-------|--------|--------|--------|--------|---------|--------|
| 44(H) | 0.0227 | 0.0231 | 0.0385 | 0.0159 | -0.0004 | 0.0077 |
| 45(H) | 0.0148 | 0.007  | 0.0542 | 0.0395 | 0.0078  | 0.0236 |
| 46(H) | 0.16   | 0.1486 | 0.1684 | 0.0084 | 0.0114  | 0.0099 |
| 47(H) | 0.0284 | 0.0251 | 0.0383 | 0.0099 | 0.0033  | 0.0066 |
| 48(H) | 0.0359 | 0.0258 | 0.044  | 0.0081 | 0.0101  | 0.0091 |
| 49(H) | 0.0311 | 0.0187 | 0.0363 | 0.0051 | 0.0125  | 0.0088 |
| 50(H) | 0.034  | 0.0251 | 0.0378 | 0.0038 | 0.0088  | 0.0063 |
| 51(H) | 0.0353 | 0.0351 | 0.038  | 0.0027 | 0.0001  | 0.0014 |
| 52(H) | 0.0322 | 0.0217 | 0.0372 | 0.005  | 0.0105  | 0.0078 |
| 53(H) | 0.032  | 0.0203 | 0.0417 | 0.0096 | 0.0117  | 0.0107 |
| 54(H) | 0.0513 | 0.0276 | 0.0722 | 0.0209 | 0.0237  | 0.0223 |
| 55(H) | 0.0502 | 0.0208 | 0.0699 | 0.0198 | 0.0294  | 0.0246 |
| 56(H) | 0.0359 | 0.0169 | 0.0551 | 0.0192 | 0.019   | 0.0191 |

**Table S2.** Hirshfeld charge and Fukui index values calculated for CIP

| Atom  | q(N)    | q(N+1)  | q(N-1)  | f <sup>-</sup> | f <sup>+</sup> | f <sup>0</sup> |
|-------|---------|---------|---------|----------------|----------------|----------------|
| 1(C)  | 0.1982  | 0.1688  | 0.2098  | 0.0115         | 0.0294         | 0.0205         |
| 2(C)  | -0.0588 | -0.1007 | -0.0233 | 0.0355         | 0.0419         | 0.0387         |
| 3(C)  | 0.1176  | 0.0658  | 0.1425  | 0.0249         | 0.0518         | 0.0383         |
| 4(C)  | -0.033  | -0.0395 | 0.0258  | 0.0588         | 0.0065         | 0.0327         |
| 5(C)  | -0.0408 | -0.0961 | -0.0142 | 0.0266         | 0.0553         | 0.0409         |
| 6(C)  | 0.0843  | 0.042   | 0.1413  | 0.057          | 0.0422         | 0.0496         |
| 7(C)  | 0.0404  | -0.0029 | 0.0659  | 0.0256         | 0.0433         | 0.0344         |
| 8(N)  | -0.0728 | -0.0874 | 0.0077  | 0.0805         | 0.0146         | 0.0476         |
| 9(C)  | -0.0076 | -0.0138 | 0.0069  | 0.0145         | 0.0062         | 0.0103         |
| 10(C) | -0.0112 | -0.0176 | -0.0008 | 0.0104         | 0.0064         | 0.0084         |
| 11(N) | -0.1654 | -0.1713 | -0.1452 | 0.0202         | 0.0059         | 0.013          |
| 12(C) | -0.0113 | -0.018  | 0.0001  | 0.0114         | 0.0067         | 0.009          |
| 13(C) | -0.0054 | -0.0094 | 0.0081  | 0.0135         | 0.004          | 0.0087         |
| 14(C) | -0.0785 | -0.1309 | -0.0578 | 0.0207         | 0.0524         | 0.0366         |
| 15(C) | 0.0405  | 0.0298  | 0.0698  | 0.0293         | 0.0107         | 0.02           |
| 16(N) | -0.001  | -0.0327 | 0.0301  | 0.0312         | 0.0316         | 0.0314         |
| 17(C) | 0.0371  | -0.0737 | 0.058   | 0.0209         | 0.1108         | 0.0659         |
| 18(C) | 0.0189  | 0.0189  | 0.0193  | 0.0004         | -0.0001        | 0.0002         |
| 19(C) | -0.0652 | -0.0793 | -0.055  | 0.0103         | 0.0141         | 0.0122         |
| 20(C) | -0.0618 | -0.0761 | -0.0463 | 0.0155         | 0.0143         | 0.0149         |
| 21(F) | -0.0947 | -0.1279 | -0.0512 | 0.0435         | 0.0332         | 0.0384         |
| 22(O) | -0.2731 | -0.3538 | -0.176  | 0.0971         | 0.0807         | 0.0889         |
| 23(O) | -0.199  | -0.22   | -0.1817 | 0.0174         | 0.0209         | 0.0192         |
| 24(O) | -0.2703 | -0.3261 | -0.2365 | 0.0338         | 0.0558         | 0.0448         |
| 25(H) | 0.0595  | 0.0324  | 0.081   | 0.0215         | 0.0271         | 0.0243         |
| 26(H) | 0.0359  | 0.0321  | 0.047   | 0.0111         | 0.0038         | 0.0075         |
| 27(H) | 0.0232  | 0.0121  | 0.0518  | 0.0286         | 0.0111         | 0.0199         |
| 28(H) | 0.0198  | 0.0132  | 0.0336  | 0.0139         | 0.0065         | 0.0102         |
| 29(H) | 0.0379  | 0.0253  | 0.0568  | 0.0189         | 0.0126         | 0.0158         |
| 30(H) | 0.1067  | 0.0942  | 0.1265  | 0.0198         | 0.0125         | 0.0162         |
| 31(H) | 0.036   | 0.0238  | 0.0549  | 0.0188         | 0.0122         | 0.0155         |
| 32(H) | 0.0185  | 0.0114  | 0.0327  | 0.0142         | 0.0071         | 0.0106         |
| 33(H) | 0.0226  | 0.0141  | 0.0495  | 0.0269         | 0.0085         | 0.0177         |
| 34(H) | 0.0364  | 0.0336  | 0.0495  | 0.0131         | 0.0028         | 0.0079         |
| 35(H) | 0.0347  | 0.0127  | 0.0499  | 0.0152         | 0.0221         | 0.0186         |
| 36(H) | 0.0513  | 0.0114  | 0.0687  | 0.0174         | 0.0399         | 0.0286         |
| 37(H) | 0.0474  | 0.0297  | 0.0601  | 0.0126         | 0.0177         | 0.0152         |
| 38(H) | 0.0485  | 0.0306  | 0.0596  | 0.0111         | 0.0179         | 0.0145         |
| 39(H) | 0.0515  | 0.0442  | 0.0557  | 0.0042         | 0.0073         | 0.0058         |
| 40(H) | 0.0522  | 0.0437  | 0.0612  | 0.009          | 0.0086         | 0.0088         |
| 41(H) | 0.0514  | 0.0328  | 0.0673  | 0.0159         | 0.0186         | 0.0173         |
| 42(H) | 0.1794  | 0.1543  | 0.1966  | 0.0172         | 0.0251         | 0.0211         |

**Table S3.** Hirshfeld charge and Fukui index values calculated for NOR

| Atom  | q(N)    | q(N+1)  | q(N-1)  | f <sup>-</sup> | f <sup>+</sup> | f <sup>0</sup> |
|-------|---------|---------|---------|----------------|----------------|----------------|
| 1(C)  | -0.0148 | -0.0208 | 0.0034  | 0.0183         | 0.006          | 0.0121         |
| 2(C)  | -0.0049 | -0.0113 | 0.0121  | 0.017          | 0.0065         | 0.0117         |
| 3(N)  | -0.0656 | -0.0818 | 0.0251  | 0.0907         | 0.0162         | 0.0534         |
| 4(C)  | 0.0416  | 0.0003  | 0.0649  | 0.0233         | 0.0413         | 0.0323         |
| 5(C)  | -0.0842 | -0.1369 | -0.0589 | 0.0253         | 0.0527         | 0.039          |
| 6(C)  | 0.0414  | 0.0289  | 0.0693  | 0.0278         | 0.0126         | 0.0202         |
| 7(C)  | -0.0356 | -0.0423 | 0.0287  | 0.0643         | 0.0067         | 0.0355         |
| 8(C)  | 0.1165  | 0.0705  | 0.1393  | 0.0228         | 0.046          | 0.0344         |
| 9(C)  | -0.059  | -0.1025 | -0.0317 | 0.0273         | 0.0435         | 0.0354         |
| 10(C) | 0.198   | 0.1664  | 0.2082  | 0.0101         | 0.0316         | 0.0209         |
| 11(O) | -0.1996 | -0.2213 | -0.184  | 0.0156         | 0.0217         | 0.0187         |
| 12(O) | -0.2703 | -0.3284 | -0.2407 | 0.0297         | 0.0581         | 0.0439         |
| 13(C) | 0.0362  | -0.0743 | 0.0557  | 0.0195         | 0.1105         | 0.065          |
| 14(N) | -0.0029 | -0.0333 | 0.0182  | 0.0211         | 0.0304         | 0.0257         |
| 15(C) | 0.016   | 0.0073  | 0.0224  | 0.0063         | 0.0087         | 0.0075         |
| 16(C) | -0.0852 | -0.0947 | -0.078  | 0.0072         | 0.0096         | 0.0084         |
| 17(O) | -0.2752 | -0.3505 | -0.1879 | 0.0873         | 0.0752         | 0.0813         |
| 18(C) | -0.0401 | -0.0968 | -0.0134 | 0.0267         | 0.0567         | 0.0417         |
| 19(C) | 0.081   | 0.0352  | 0.1356  | 0.0546         | 0.0458         | 0.0502         |
| 20(F) | -0.0945 | -0.129  | -0.053  | 0.0415         | 0.0345         | 0.038          |
| 21(C) | -0.0024 | -0.0083 | 0.014   | 0.0164         | 0.0059         | 0.0112         |
| 22(C) | -0.0157 | -0.021  | 0.0016  | 0.0172         | 0.0054         | 0.0113         |
| 23(N) | -0.1645 | -0.1739 | -0.1323 | 0.0322         | 0.0093         | 0.0208         |
| 24(H) | 0.0383  | 0.0232  | 0.0626  | 0.0243         | 0.0151         | 0.0197         |
| 25(H) | 0.0162  | 0.016   | 0.0302  | 0.0139         | 0.0002         | 0.0071         |
| 26(H) | 0.0349  | 0.0203  | 0.0605  | 0.0255         | 0.0146         | 0.0201         |
| 27(H) | 0.0374  | 0.0334  | 0.0511  | 0.0138         | 0.004          | 0.0089         |
| 28(H) | 0.0326  | 0.0094  | 0.048   | 0.0154         | 0.0232         | 0.0193         |
| 29(H) | 0.1793  | 0.1539  | 0.1952  | 0.016          | 0.0254         | 0.0207         |
| 30(H) | 0.052   | 0.0107  | 0.0694  | 0.0173         | 0.0413         | 0.0293         |
| 31(H) | 0.047   | 0.0312  | 0.0614  | 0.0143         | 0.0158         | 0.0151         |
| 32(H) | 0.0411  | 0.0256  | 0.0475  | 0.0064         | 0.0154         | 0.0109         |
| 33(H) | 0.0401  | 0.019   | 0.0554  | 0.0153         | 0.0211         | 0.0182         |
| 34(H) | 0.0353  | 0.0284  | 0.035   | -0.0003        | 0.0069         | 0.0033         |
| 35(H) | 0.0393  | 0.0303  | 0.0489  | 0.0096         | 0.0091         | 0.0093         |
| 36(H) | 0.0597  | 0.032   | 0.0815  | 0.0219         | 0.0277         | 0.0248         |
| 37(H) | 0.0377  | 0.0345  | 0.0535  | 0.0158         | 0.0032         | 0.0095         |
| 38(H) | 0.0369  | 0.0204  | 0.0641  | 0.0272         | 0.0166         | 0.0219         |
| 39(H) | 0.0133  | 0.0137  | 0.0269  | 0.0136         | -0.0004        | 0.0066         |
| 40(H) | 0.0359  | 0.0221  | 0.0592  | 0.0233         | 0.0138         | 0.0186         |
| 41(H) | 0.1068  | 0.0947  | 0.1312  | 0.0244         | 0.0121         | 0.0182         |

**Table S4.** Hirshfeld charge and Fukui index calculated for OTC

| Atom  | q(N)    | q(N+1)  | q(N-1)  | f <sup>-</sup> | f <sup>+</sup> | f <sup>0</sup> |
|-------|---------|---------|---------|----------------|----------------|----------------|
| 1(C)  | 0.1009  | 0.0782  | 0.1292  | 0.0283         | 0.0227         | 0.0255         |
| 2(C)  | -0.0552 | -0.0902 | -0.015  | 0.0402         | 0.035          | 0.0376         |
| 3(C)  | -0.0258 | -0.0772 | 0.0011  | 0.0269         | 0.0514         | 0.0391         |
| 4(C)  | -0.066  | -0.0862 | -0.0202 | 0.0458         | 0.0201         | 0.033          |
| 5(C)  | 0       | -0.0267 | 0.0152  | 0.0152         | 0.0266         | 0.0209         |
| 6(C)  | -0.0461 | -0.0629 | -0.0296 | 0.0166         | 0.0167         | 0.0166         |
| 7(C)  | 0.1569  | 0.1029  | 0.1672  | 0.0103         | 0.054          | 0.0322         |
| 8(C)  | -0.034  | -0.038  | -0.0242 | 0.0098         | 0.004          | 0.0069         |
| 9(C)  | 0.0486  | 0.0465  | 0.0639  | 0.0153         | 0.0021         | 0.0087         |
| 10(C) | 0.0655  | 0.0624  | 0.0818  | 0.0163         | 0.0032         | 0.0097         |
| 11(C) | 0.1447  | 0.1046  | 0.1565  | 0.0118         | 0.0401         | 0.0259         |
| 12(C) | 0.1763  | 0.1598  | 0.1808  | 0.0044         | 0.0165         | 0.0105         |
| 13(N) | -0.1432 | -0.1574 | -0.1322 | 0.0109         | 0.0143         | 0.0126         |
| 14(O) | -0.2561 | -0.2963 | -0.2302 | 0.0259         | 0.0402         | 0.033          |
| 15(C) | 0.0236  | 0.0159  | 0.0305  | 0.0069         | 0.0077         | 0.0073         |
| 16(C) | -0.0305 | -0.032  | -0.0269 | 0.0036         | 0.0016         | 0.0026         |
| 17(C) | 0.048   | 0.0462  | 0.0516  | 0.0036         | 0.0018         | 0.0027         |
| 18(C) | -0.0249 | -0.0274 | -0.0215 | 0.0035         | 0.0024         | 0.0029         |
| 19(C) | 0.0915  | 0.0899  | 0.0938  | 0.0024         | 0.0016         | 0.002          |
| 20(C) | -0.0973 | -0.104  | -0.0907 | 0.0065         | 0.0067         | 0.0066         |
| 21(O) | -0.215  | -0.2227 | -0.2058 | 0.0092         | 0.0078         | 0.0085         |
| 22(O) | -0.227  | -0.2381 | -0.2109 | 0.016          | 0.0111         | 0.0136         |
| 23(N) | -0.0622 | -0.0667 | -0.03   | 0.0322         | 0.0045         | 0.0183         |
| 24(C) | -0.0338 | -0.0419 | -0.0232 | 0.0106         | 0.0081         | 0.0093         |
| 25(C) | -0.0409 | -0.0458 | -0.0302 | 0.0107         | 0.005          | 0.0078         |
| 26(O) | -0.1633 | -0.2094 | -0.1416 | 0.0217         | 0.0461         | 0.0339         |
| 27(O) | -0.2212 | -0.2773 | -0.1733 | 0.0478         | 0.0561         | 0.052          |
| 28(O) | -0.243  | -0.2611 | -0.1827 | 0.0603         | 0.0182         | 0.0392         |
| 29(O) | -0.2428 | -0.2558 | -0.178  | 0.0648         | 0.013          | 0.0389         |
| 30(O) | -0.2075 | -0.27   | -0.1785 | 0.029          | 0.0626         | 0.0458         |
| 31(O) | -0.1867 | -0.2163 | -0.1294 | 0.0573         | 0.0296         | 0.0434         |
| 32(C) | 0.1138  | 0.0474  | 0.1231  | 0.0093         | 0.0664         | 0.0379         |
| 33(C) | -0.069  | -0.0971 | -0.0588 | 0.0102         | 0.0281         | 0.0192         |
| 34(H) | 0.0529  | 0.0303  | 0.0753  | 0.0224         | 0.0226         | 0.0225         |
| 35(H) | 0.0505  | 0.0239  | 0.0712  | 0.0208         | 0.0266         | 0.0237         |
| 36(H) | 0.0375  | 0.0211  | 0.0577  | 0.0202         | 0.0164         | 0.0183         |
| 37(H) | 0.0396  | 0.0319  | 0.0469  | 0.0072         | 0.0078         | 0.0075         |
| 38(H) | 0.0332  | 0.0229  | 0.0485  | 0.0153         | 0.0103         | 0.0128         |
| 39(H) | 0.1341  | 0.1158  | 0.1474  | 0.0133         | 0.0183         | 0.0158         |
| 40(H) | 0.131   | 0.1232  | 0.1362  | 0.0052         | 0.0079         | 0.0065         |
| 41(H) | 0.0334  | 0.0198  | 0.0489  | 0.0155         | 0.0136         | 0.0146         |
| 42(H) | 0.035   | 0.0239  | 0.044   | 0.009          | 0.011          | 0.01           |
| 43(H) | 0.0157  | 0.0154  | 0.0197  | 0.0039         | 0.0004         | 0.0021         |

|       |        |        |        |        |        |        |
|-------|--------|--------|--------|--------|--------|--------|
| 44(H) | 0.0317 | 0.0239 | 0.0387 | 0.0069 | 0.0079 | 0.0074 |
| 45(H) | 0.0282 | 0.0182 | 0.0381 | 0.0099 | 0.01   | 0.0099 |
| 46(H) | 0.0306 | 0.0207 | 0.0392 | 0.0086 | 0.0098 | 0.0092 |
| 47(H) | 0.0358 | 0.0294 | 0.0422 | 0.0063 | 0.0064 | 0.0064 |
| 48(H) | 0.1576 | 0.1488 | 0.166  | 0.0084 | 0.0089 | 0.0086 |
| 49(H) | 0.1429 | 0.1354 | 0.152  | 0.0091 | 0.0075 | 0.0083 |
| 50(H) | 0.0414 | 0.0281 | 0.0555 | 0.0141 | 0.0133 | 0.0137 |
| 51(H) | 0.0399 | 0.0358 | 0.0462 | 0.0063 | 0.0041 | 0.0052 |
| 52(H) | 0.0276 | 0.0169 | 0.0475 | 0.0199 | 0.0108 | 0.0153 |
| 53(H) | 0.0404 | 0.0259 | 0.0545 | 0.0141 | 0.0145 | 0.0143 |
| 54(H) | 0.0363 | 0.0357 | 0.0431 | 0.0068 | 0.0007 | 0.0037 |
| 55(H) | 0.0244 | 0.0159 | 0.043  | 0.0186 | 0.0085 | 0.0136 |
| 56(H) | 0.1414 | 0.1265 | 0.1507 | 0.0093 | 0.0149 | 0.0121 |
| 57(H) | 0.1091 | 0.103  | 0.1245 | 0.0154 | 0.0061 | 0.0107 |
| 58(H) | 0.1273 | 0.121  | 0.1435 | 0.0162 | 0.0063 | 0.0112 |
| 59(H) | 0.1439 | 0.1334 | 0.1578 | 0.0139 | 0.0105 | 0.0122 |

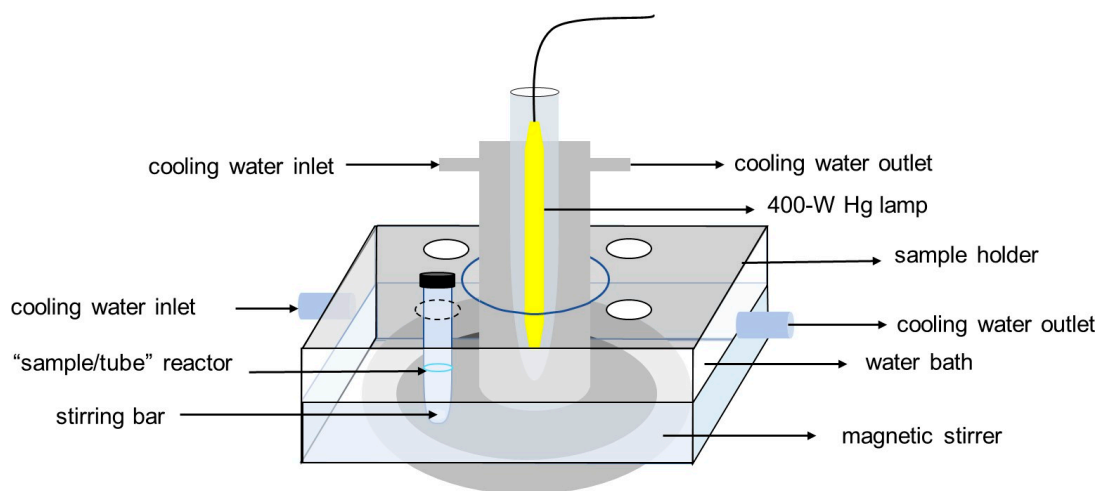

**Figure S4.** Schematic drawing of photoreactor system used for testing of H<sub>2</sub> evolution reaction.



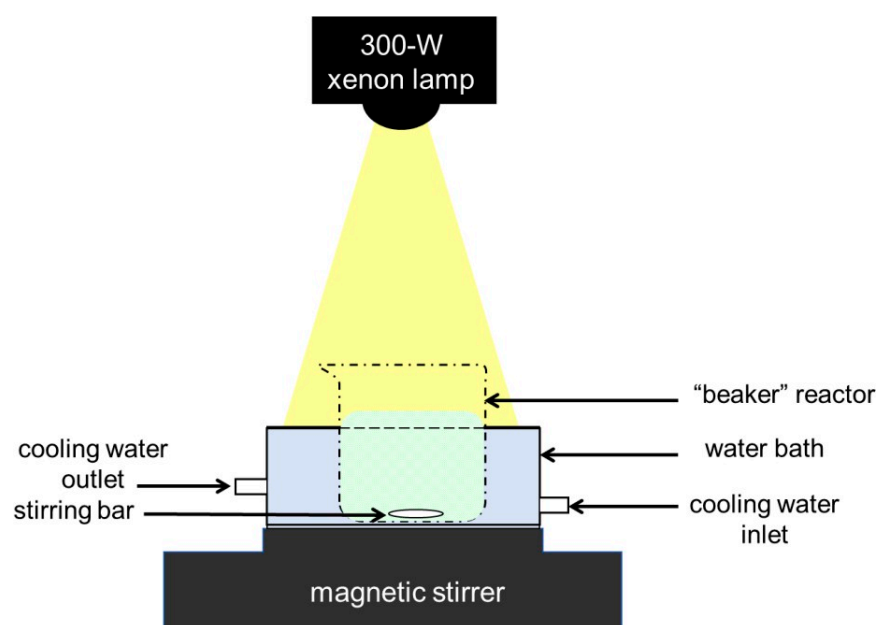

**Figure S5.** Schematic drawing of photoreactor system used for testing of TC degradation.
